# Supplementary material for: Competitive lottery-based assembly of selected clades in the human gut microbiome
Source: PubMed Central journal article supplement (PMC6195700; doi:10.1186/s40168-018-0571-8), 2018-10-19

## Stage 1: Total abundance is split between groups

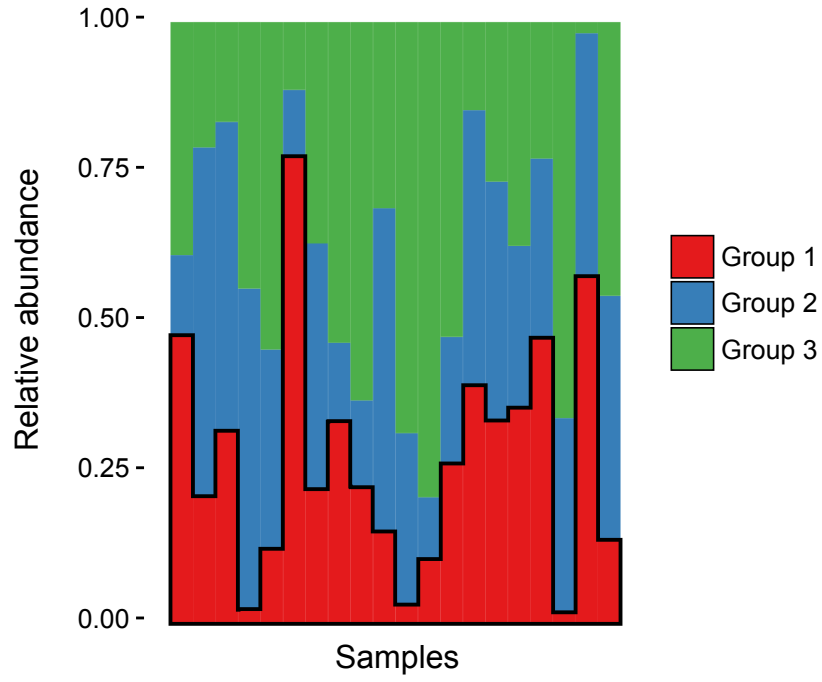

## Stage 2: Group abundance is split between OTUs

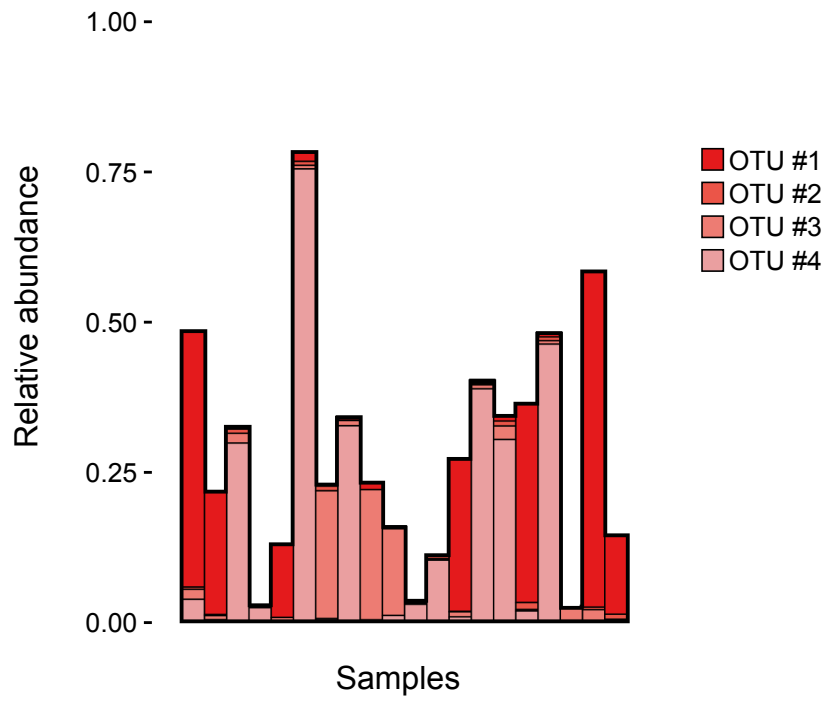

Supplement: 40168_2018_571_MOESM1_ESM.pdf [file 40168_2018_571_MOESM1_ESM.pdf]
