# Supplementary material for: Competitive lottery-based assembly of selected clades in the human gut microbiome
Source: PubMed Central journal article supplement (PMC6195700; doi:10.1186/s40168-018-0571-8), 2018-10-19

A

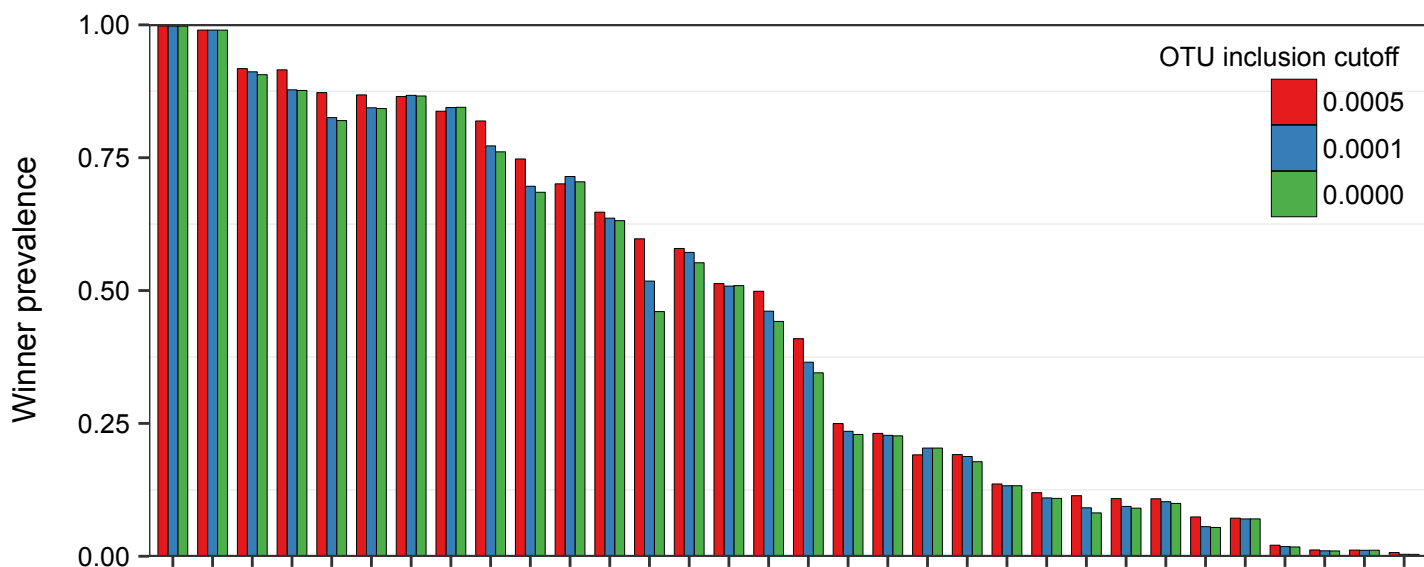

B

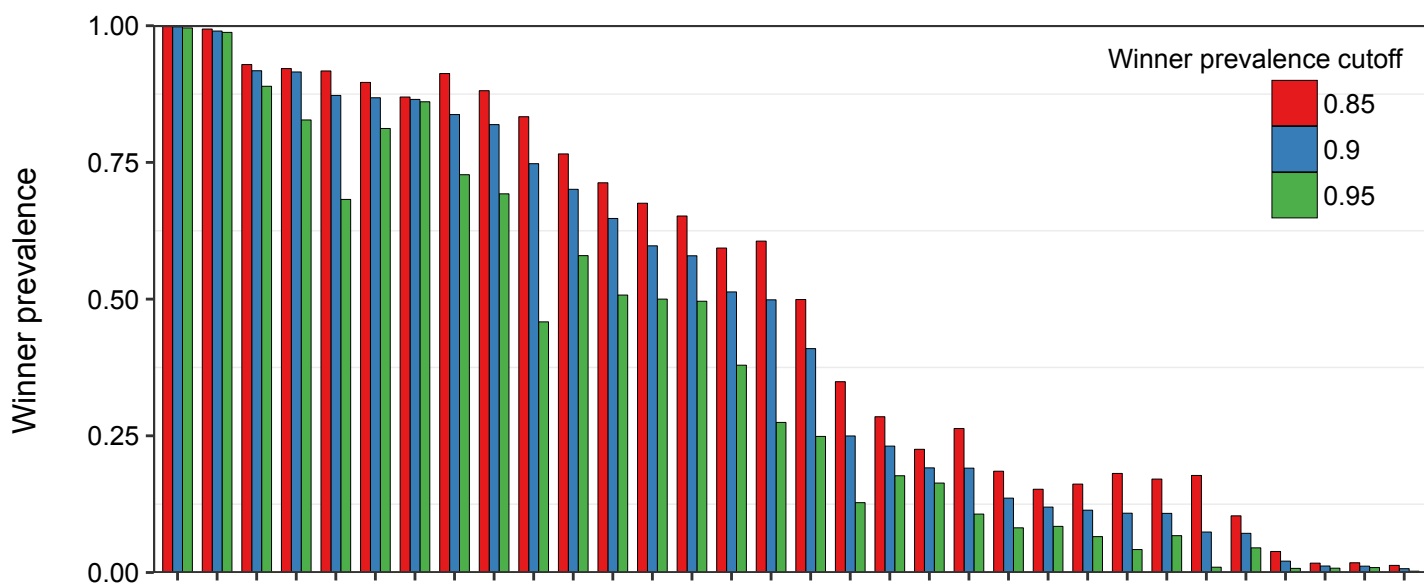

C

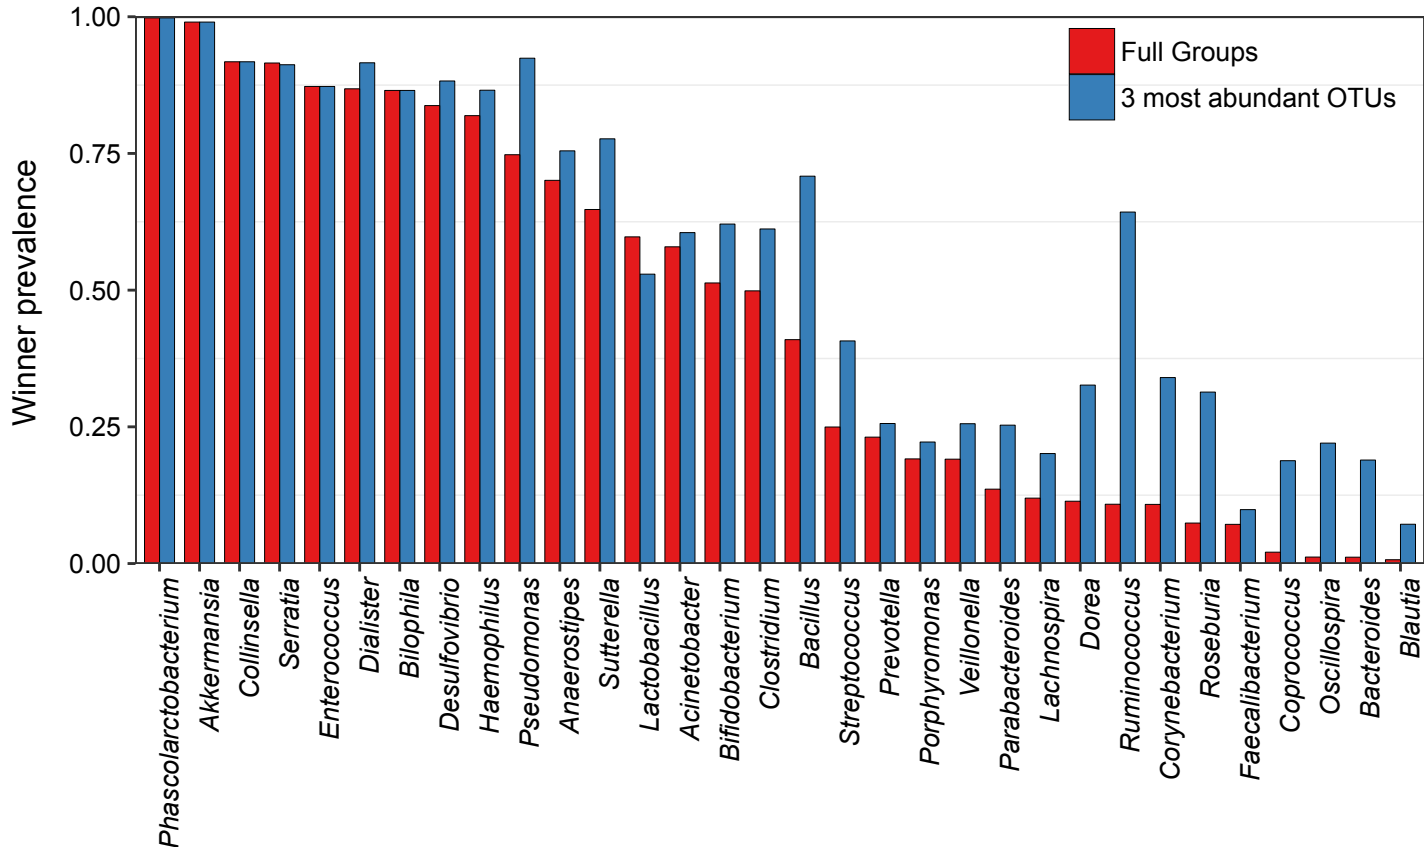

Supplement: 40168_2018_571_MOESM3_ESM.pdf [file 40168_2018_571_MOESM3_ESM.pdf]
